# Supplementary material for: LncRNA NEAT1/miR-129/Bcl-2 signaling axis contributes to HDAC inhibitor tolerance in nasopharyngeal cancer
Source: publisher site journal article supplement (doi:10.18632/aging.103427), 2020-07-21
Supplement: Supplementary file [file aging-v12i14-103427-supplementary-material-SD1.pdf]

**SUPPLEMENTARY FIGURES**

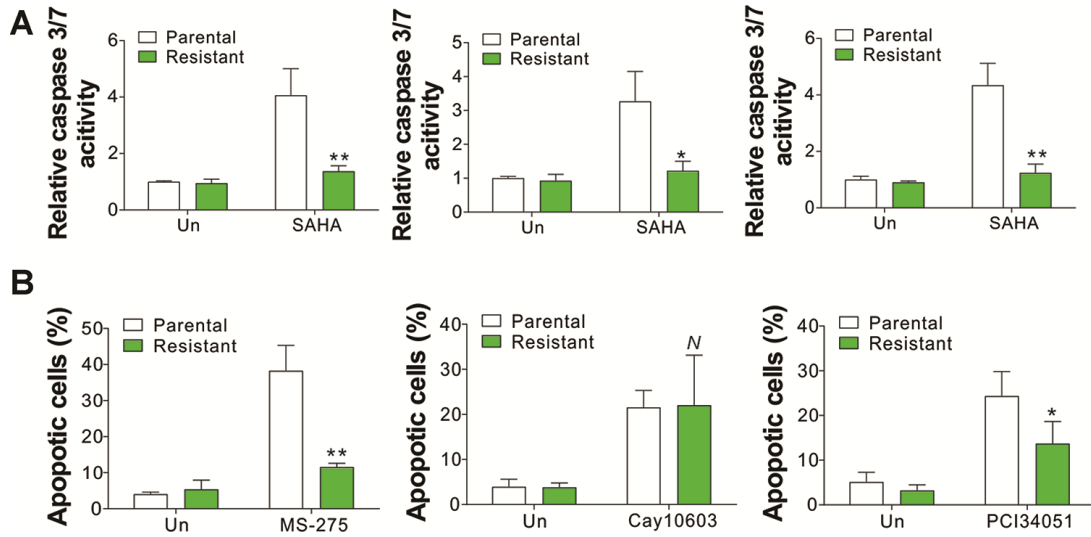

**Supplementary Figure 1. Less apoptosis was induced the SAHA resistant NPC cells.** (A) The caspase-3/7 activity in parental and SAHA-tolerant cells subjected to 4  $\mu\text{mol/L}$  of SAHA for 24 h. (B) The apoptosis of parental and SAHA-tolerant C666-1 cells subjected to 2.5  $\mu\text{mol/L}$  of MS-275, 4  $\text{nmol/L}$  of Cay10603, or 10  $\mu\text{mol/L}$  of PCI34051 for 24 h. Each experiment was performed for 3 times. N,  $p>0.05$ ; \*,  $p<0.05$ ; \*\*,  $p<0.01$ .

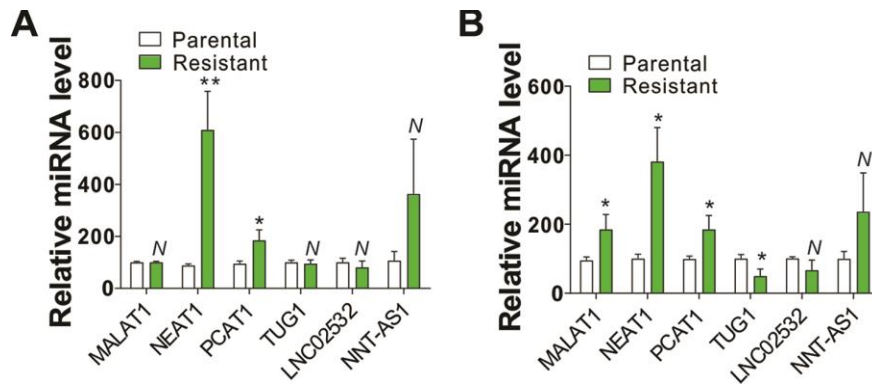

**Supplementary Figure 2. NEAT1 expression was induced in SAHA resistant NPC cells.** (A) The expression of indicated LncRNA in CNE-1 parental and resistant cells. (B) The expression of indicated LncRNA in CNE-2 parental and resistant cells. Each experiment was performed for 3 times. N,  $p>0.05$ ; \*,  $p<0.05$ ; \*\*,  $p<0.01$ .

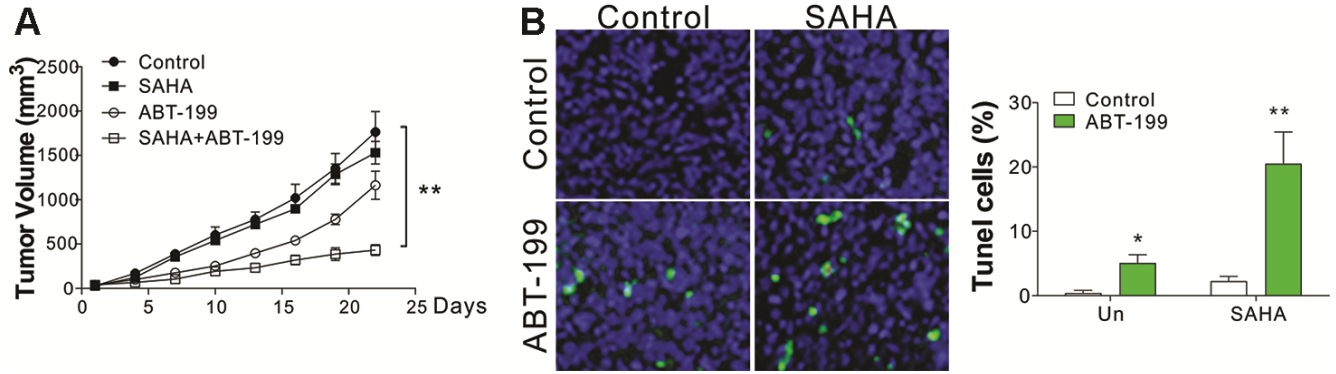

**Supplementary Figure 3. ABT-199 enhanced the killing effect of SAHA *in vivo*.** (A) The tumor growth curves of nude mice xenografted with C666-1R cells and treated with SAHA and/or ABT-199. (B) The TUNEL staining of tumors in each group. \*,  $p < 0.05$ ; \*\*,  $p < 0.01$ .
